# Supplementary material for: Do small precocial birds enter torpor to conserve energy during development?
Source: Oxford University Press journal article supplement (doi:10.1242/jeb.231761), 2020-01-01
Supplement: jeb231761supp.pdf [file jeb231761supp.pdf]

**Table S1:** Summary table of the overnight metabolic measurements in each chick in the study (each chick was measured twice). Minimum and maximum metabolic rates are shown for both total (Total MR<sub>min</sub> and Total MR<sub>max</sub>; ml O<sub>2</sub> h<sup>-1</sup>) and mass-specific (MR<sub>min</sub> and MR<sub>max</sub>; ml O<sub>2</sub> g<sup>-1</sup> h<sup>-1</sup>) units, and were calculated as the lowest, and highest mean rate of oxygen consumption, respectively, measured consecutively over a 36 minutes period.

| Chick | Age (d) | Body mass (g) | Total MR <sub>min</sub> | Total MR <sub>max</sub> | MR <sub>min</sub> | MR <sub>max</sub> | Mass loss <sup>1</sup> | T <sub>s</sub> start <sup>2</sup> | T <sub>s</sub> end <sup>2</sup> |
|-------|---------|---------------|-------------------------|-------------------------|-------------------|-------------------|------------------------|-----------------------------------|---------------------------------|
| 1     | 14      | 14.2          | 31.3                    | 90.26                   | 2.51              | 6.44              | 3.24                   | 40.2                              | 26.2                            |
| 1     | 21      | 24.6          | 67.29                   | 99.95                   | 3.04              | 4.81              | 4.25                   | 39.4                              | 38.8                            |
| 2     | 17      | 16.13         | 37.59                   | 90.11                   | 2.69              | 5.61              | 3.22                   | 40                                | 25.6                            |
| 2     | 21      | 20.63         | 58.68                   | 99.79                   | 3.13              | 5.36              | 3.91                   | 38.8                              | 39                              |
| 3     | 12      | 17.8          | 58.03                   | 90.24                   | 3.64              | 5.09              | 2.96                   | 39.4                              | 38                              |
| 3     | 17      | 23.07         | 60.06                   | 91.2                    | 2.78              | 4.41              | 3.72                   | 40.6                              | 39.8                            |
| 4     | 12      | 16.3          | 58.66                   | 104.34                  | 4.11              | 6.53              | 3.54                   | 40                                | 37.6                            |
| 4     | 18      | 23.6          | 63.53                   | 106.9                   | 2.99              | 4.55              | 4.25                   | 41                                | 38.8                            |
| 5     | 14      | 16.9          | 41.39                   | 74.48                   | 2.76              | 4.47              | 3.4                    | 40.8                              | 32.8                            |
| 5     | 18      | 23.7          | 69.56                   | 98.8                    | 3.24              | 4.79              | 3.83                   | 41                                | 36.6                            |
| 6     | 16      | 21.9          | 63.71                   | 119.67                  | 3.3               | 5.49              | 4.6                    | 39.8                              | 35.8                            |
| 6     | 22      | 27.33         | 70.39                   | 122.05                  | 2.83              | 4.53              | 4.6                    | 39.6                              | 39.4                            |
| 7     | 15      | 18.84         | 63.14                   | 110.36                  | 3.69              | 6.33              | 4.37                   | 40.8                              | 39.4                            |
| 7     | 19      | 22.6          | 64.13                   | 102.66                  | 3.05              | 5.33              | 4.1                    | 40.6                              | 37.8                            |
| 8     | 15      | 23.25         | 66.37                   | 112.66                  | 3.19              | 4.91              | 4.09                   | 40.6                              | 37.4                            |
| 8     | 19      | 26.8          | 96.99                   | 137.26                  | 3.72              | 5.42              | 3.37                   | 40.8                              | 40                              |
| 9     | 16      | 20.19         | 55.06                   | 109.64                  | 3.1               | 5.48              | 3.83                   | 39.8                              | 24.6                            |
| 9     | 22      | 26.12         | 87.06                   | 141.12                  | 3.76              | 5.73              | 3.83                   | 40.6                              | 38.4                            |

<sup>1</sup>Mass loss was calculated as the difference between mass measured before and after measurement night and was used to calculate mass-specific MR, assuming a linear mass loss during the night.

<sup>2</sup>T<sub>s</sub> start and T<sub>s</sub> end are surface temperatures before and after the nightly metabolic rates measurements.
